# Supplementary material for: Low-complexity optimal spatial channel pairing for AF-based multi-pair two-way relay networks
Source: Springer Nature journal article supplement (doi:10.1007/s11432-014-5102-z), 2014-09-05
Supplement: 11432_2014_5102_MOESM1_ESM.pdf [file 11432_2014_5102_MOESM1_ESM.pdf]

中文题目: 基于放大转发策略的多用户对双向中继无线网络低复杂度的最优空间信道配对方法

摘要: 针对多用户对双向中继无线网络中块对角化波束成形算法, 设计一种低复杂度最大化和速率的空间信道配对方法. 所提出最大化和速率方案, 以最大化系统和速率为代价函数, 在中继站将每个用户上行链路的空间子信道与其相应的下行链路的空间子信道进行最优配对. 为了推导最优信道配对方法的闭合表达式, 本文提出并证明了一个新的数学不等式定理—连乘排序不等式定理, 并应用该定理证明了最大化和速率空间信道配对方法的充分必要条件, 从而获得该方法的解析公式. 仿真结果表明: 我们提出的最大化和速率空间信道配对方法同其他的空间信道配对方法相比能够实现显著的和速率提升.

关键词: 多用户对双向中继, 空间信道配对, 最大化和速率, 连乘排序不等式

创新点:

1. 建立了具备空间信道配对功能的多用户对双向中继无线网络模型;
2. 提出、推导和证明了连乘排序不等式定理;
3. 提出低复杂度的最大化和速率空间配对方法, 并推导其闭合表达式.
